# Supplementary material for: Evaporation front and its motion
Source: Copernicus journal article supplement (doi:10.5194/hess-2021-340), 2021-07-26
Supplement: Supplementary file [file hess-2021-340-AC1-supplement.pdf]

However, the paper itself is written somewhat carelessly. I was not able to understand the derivation of the formula (5), which gives the main result of the paper.

I suggest to make the following change (blue color) of the text and to rearrange members of Eq. (3) so that the correspondence between them and the newly inserted text is clearly visible.

Let  $\xi = \xi(t)$  be a point upon the evaporation front at time  $t$ ;  $\xi \in \gamma_t$ . Let  $\delta t$  be an elementary time step and  $\delta S$  an elementary surface surrounding the point  $\xi$ ,  $\delta S \subset \gamma_t$ . Denote by  $\nu(t, \xi)$  the unit normal vector to  $\gamma_t$  at point  $\xi$ , oriented out of the wet zone, and by  $\delta s$  the distance between the positions  $\gamma_t$  and  $\gamma_{t+\delta t}$  at  $\xi$ . Then the flow and transport of water coming to the elementary surface  $\delta S$  from the wet zone,  $\rho \mathbf{w} + \mathbf{b}^w + c^w \mathbf{v}^w$ , pushes the front towards the dry zone, and the transport of water out of  $\delta S$  into the dry zone,  $\mathbf{b}^d + c^d \mathbf{v}^d$ , pushes the front towards the wet zone. The excess of water coming to  $\delta S$  during the time interval  $\delta t$ ,  $(\rho \mathbf{w} + \mathbf{b}^w + c^w \mathbf{v}^w - \mathbf{b}^d - c^d \mathbf{v}^d, \nu)$ , is compensated by the mass of water  $\delta s \delta S (\rho \theta + c^w (n - \theta) - n c^d)$  shifting the surface  $\delta S$  to its new position distant by  $\delta s$  in the direction  $\nu$ . Here and in the sequel,  $(\mathbf{u}, \mathbf{v})$ , where  $\mathbf{u}, \mathbf{v}$  are two vectors, denotes the scalar product. This account gives the balance equation

$$\begin{aligned} \delta S \delta t (\rho \mathbf{w}(t, \xi) + \mathbf{b}^w(t, \xi) + c^w(t, \xi) \mathbf{v}^w(t, \xi) - \mathbf{b}^d(t, \xi) - c^d(t, \xi) \mathbf{v}^d(t, \xi), \nu(t, \xi)) \\ = \delta S \delta s (\theta(t, \xi) \rho + (n - \theta(t, \xi)) c^w(t, \xi) - n c^d(t, \xi)) \end{aligned} \quad (3)$$

It is not necessary to make any changes in s Eqs. (4), (5) and (6), I only suggest to remove the superfluous brackets.

I believe that Eq. (5) does not require any further comment, since it was derived from Eq. (3) which is now explained in the blue colored lines.

What do the designations `n` and `_theta` mean?

I suggest not to use the symbol `_theta` (water content) in line 87, and to introduce and define it in line 92.

I suggest to introduce and define the symbol  $n$  (porosity) in the sentence "Denote by ...", line 120.

What is in parenthesis? Scalar product with normal?

Yes, it is the scalar product. The notation is now explained in suggested blue colored text above.
